# Supplementary material for: Zebrafish imaging reveals TP53 mutation switching oncogene-induced senescence from suppressor to driver in primary tumorigenesis
Source: PubMed Central journal article supplement (PMC8933407; doi:10.1038/s41467-022-29061-6), 2022-03-18
Supplement: 41467_2022_29061_MOESM3_ESM.pdf [file 41467_2022_29061_MOESM3_ESM.pdf]

## Description of Additional Supplementary Files

File Name: Supplementary Movie 1 & 2

Description: **Mosaic Ras<sup>G12V</sup> cell apically protrudes (1) and leaves (2) from the larval skin.**

Time-lapse imaging of the head region of 1 dpf Tg(*krt4p:gal4*; UAS:EGFP) larva with mosaically introduced mKO2<sup>+</sup>Ras<sup>+</sup> cells (red).

File Name: Supplementary Movie 3

Description: **Mosaic Ras<sup>G12V</sup>-TP53<sup>R175H</sup> double-mutant cells forms heterogenous tumour-like cell mass.**

Time-lapse imaging of the head region of 1 dpf Tg(*krt4p:gal4*; UAS:EGFP) larva with mosaically introduced mKO2<sup>+</sup>Ras<sup>+</sup>TP53<sup>+</sup> cells (red).

File Name: Supplementary Movie 4

Description: **Live imaging of Ras<sup>G12V</sup>-TP53<sup>R175H</sup> double-mutant cells to senesce.**

Time-lapse imaging of *cdkn2a/b* reporter expression (green) in 20–24 hpf Tg(*cdkn2a/b*-hs:Achilles) larvae with mosaically introduced mCherry<sup>+</sup>Ras<sup>G12V</sup>TP53<sup>R175H</sup> cells (magenta). *cdkn2a/b* reporter was gradually upregulated in the nucleus of double-mutant cell.

File Name: Supplementary Movie 5

Description: **Live imaging of Ras<sup>G12V</sup>-TP53<sup>R175H</sup> double-mutant cell neighbours to senesce.**

Time-lapse imaging of *cdkn2a/b* reporter expression (green) in 29–32 hpf Tg(*cdkn2a/b*-hs:Achilles) larvae with mosaically introduced mCherry<sup>+</sup>Ras<sup>G12V</sup>TP53<sup>R175H</sup> cells (magenta). *cdkn2a/b* reporter was gradually upregulated in the nucleus of double-mutant cell neighbour.
